# Supplementary material for: Ti3C2Tx as a Sensor for SF6/N2 Nitrogen-Containing Fault Decomposition Characteristic Products: A Theoretical Study
Source: MDPI journal article supplement (doi:10.3390/nano12132311), 2022-07-05
Supplement: s1 [file s1]

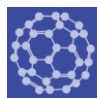

## Supplementary Material

# Ti<sub>3</sub>C<sub>2</sub>T<sub>x</sub> as a Sensor for SF<sub>6</sub>/N<sub>2</sub> Nitrogen-Containing Fault Decomposition Characteristic Products: A Theoretical Study

Fuping Zeng<sup>1,2,\*</sup>, Hao Qiu<sup>1</sup>, Xiaoxuan Feng<sup>1</sup>, Xianzong Chao<sup>1</sup>, Liangjun Dai<sup>3</sup>, Qiang Yao<sup>3</sup>, Ju Tang<sup>1,2,4</sup>

<sup>1</sup> School of Electrical Engineering and Automation, Wuhan University, Wuhan 430072, China; elvis\_qiu@icloud.com (H.Q.); xiaoxuanf@whu.edu.cn (X.F.); 2018302070035@whu.edu.cn (X.C.); cqatangju@vip.sina.com (J.T.)

<sup>2</sup> Hubei Key Laboratory of Power Equipment & System Security for Integrated Energy Resources, Wuhan 430072, China

<sup>3</sup> Electric Power Research Institute, State Grid Chongqing Electric Power Company, Chongqing 401123, China; 2018302070058@whu.edu.cn (L.D.); yaoqiang212@aliyun.com (Q.Y.)

<sup>4</sup> State Key Laboratory of Power Transmission Equipment & System Security and New Technology, Chongqing University, Chongqing 400044, China

\* Correspondence: fuping.zeng@whu.edu.cn; Tel.: +86-1397-129-0926

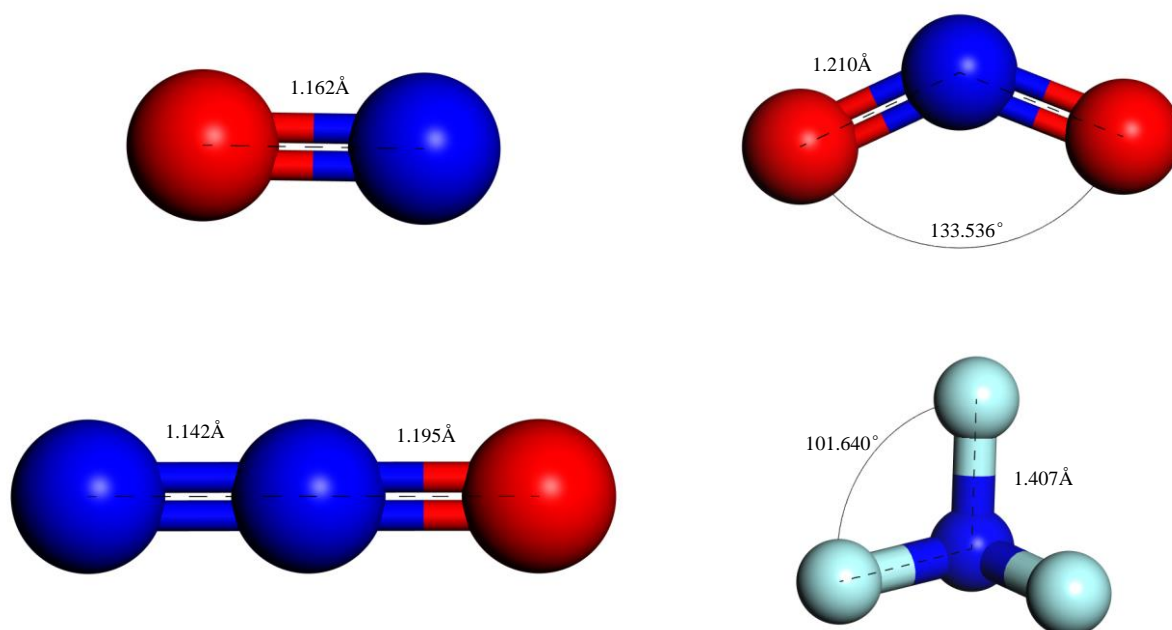

Figure S1. Molecule structures of NO, NO<sub>2</sub>, N<sub>2</sub>O and NF<sub>3</sub>.
